# Supplementary material
Source: PubMed Central journal article supplement (PMC4321288)
Supplement: pnas.201417988SI.pdf [file pnas.201417988SI.pdf]

# Supporting Information

Kumar et al. 10.1073/pnas.1417988112

## SI Materials and Methods

**Establishment of IgA Transnuclear Mice.** Briefly, cloned embryos at the stage of morula were plated individually in wells of a 96-well plate on a layer of mytomicin C-inactivated mouse embryonic fibroblasts (MEFs) and cultured in ES cell medium for 10 or more days. After this time, embryos were dissociated by trypsin digestion and single-cell suspensions plated on MEFs to ultimately establish ntES cell lines, as previously described (1). The pluripotency of ntES cell lines was confirmed by alkaline phosphatase staining and through the scoring, by immunostaining, of OCT3/4 and Nanog expression. Genomic PCR for IgH and IgL chain rearrangements confirmed the PC origin of ntES lines. One IgA ntES line displaying a normal karyotype was used to inject BALB/c blastocysts to generate chimeric mice. Crossings of IgA chimeras to C57BL/6J animals generated germ line-transmitted animals that were on the C57BL/6 X DBA/2J mixed genetic background.

**IgH Southern Blotting Analysis.** Genomic DNA (15  $\mu$ g) was digested overnight with EcoR1, transferred to a positively charged nylon membrane, and hybridized to a  $^{32}$ P-labeled genomic probe mapping downstream of J<sub>H</sub>4 (2). To control for DNA loading, membranes were stripped and rehybridized to a probe annealing to a genomic fragment of the *Il4* gene (3). Quantification of bands relative to the V<sub>H</sub>Q52<sup>NT</sup> allele was performed using ImageJ software analysis.

**In Vitro Pro-B-Cell Cultures.** *Rag2*;  *$\lambda$ 5*; *SLP65* triple-mutant pro-B cells were cultured in Iscove's medium (Biochrome AG) containing 10% (vol/vol) heat-activated fetal calf serum (PAN Biotech), 100 U/mL of penicillin, 100 U/mL of streptomycin (Life

Technologies), and 2 mM of L-glutamine (Life Technologies) and 50  $\mu$ M of 2-mercaptoethanol (Life Technologies). We added 1% supernatant of J558L cells stably transfected with a murine IL-7 expression vector to the culture. Primary BM-derived progenitor B-cell cultures were established as previously described (4). Briefly, after red blood cell lysis, BM cell suspensions were plated on OP9 cells in Iscove's modified Dulbecco's medium (GIBCO) supplemented with 20% (vol/vol) FCS, 2 mM of L-glutamine, 100 U/mL of penicillin, 100 U/mL of streptomycin (Life Technologies), and 1% supernatant of mouse IL-7-expressing J558L transfectants (kindly provided by F. Melchers, Max Planck Institute for Infection Biology, Berlin, Germany). Cocultures were fed with fresh medium every 2 d. Analysis of progenitor B cells was performed starting from day 12 of in vitro culture.

**Measurement of Anti-DNA Antibodies by ELISA.** Salmon sperm (Sigma Aldrich) was used as a source of both single-stranded (after boiling for 10 min) and double-stranded DNA. DNA (10  $\mu$ g/mL) was immobilized on NUNC Maxisorp plates. Extensive washing with PBS/Tween 0.05% was followed by incubation for 1 h at 37 °C of plates with PBS-3% (vol/vol) BSA blocking solution. Mouse sera were serially diluted and applied to DNA-coated plates. Bound antibodies were revealed using biotin-conjugated rat anti-mouse Ig $\kappa$  (cl. R331.18) followed by incubation with streptavidin-Eu<sup>3+</sup> (Perkin-Elmer). ELISAs were developed using DELFIA Enhancement Solution (Perkin-Elmer) and plates scanned for time-resolved fluorescence on an EnVision multilabel plate reader platform (Perkin-Elmer). Arbitrary units were determined by multiplying average FRET counts by the dilution factor and dividing by  $1 \times 10^6$ .

1. Wakayama T, et al. (2001) Differentiation of embryonic stem cell lines generated from adult somatic cells by nuclear transfer. *Science* 292(5517):740–743.
2. Fukita Y, Jacobs H, Rajewsky K (1998) Somatic hypermutation in the heavy chain locus correlates with transcription. *Immunity* 9(1):105–114.
3. Oberdoerffer P, Novobrantseva TI, Rajewsky K (2003) Expression of a targeted lambda 1 light chain gene is developmentally regulated and independent of Ig kappa rearrangements. *J Exp Med* 197(9):1165–1172.
4. Vieira P, Cumano A (2004) Differentiation of B lymphocytes from hematopoietic stem cells. *Methods Mol Biol* 271:67–76.
